# Supplementary material for: Comparison of tetrel bonds and halogen bonds in complexes of DMSO with ZF3X (Z = C and Si; X = halogen)
Source: Royal Society of Chemistry journal article supplement (doi:10.1039/c6ra18316f), 2016-01-01
Supplement: c6ra18316f1.pdf [file c6ra18316f1.pdf]

## Supporting Information

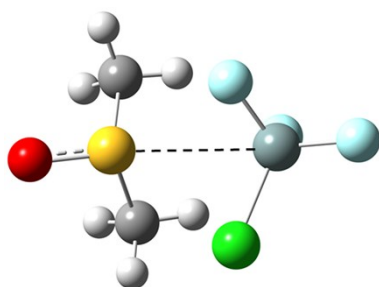

Fig. S1 Optimized structure of S...Si bonded complex of DMSO-SiF<sub>3</sub>Cl.

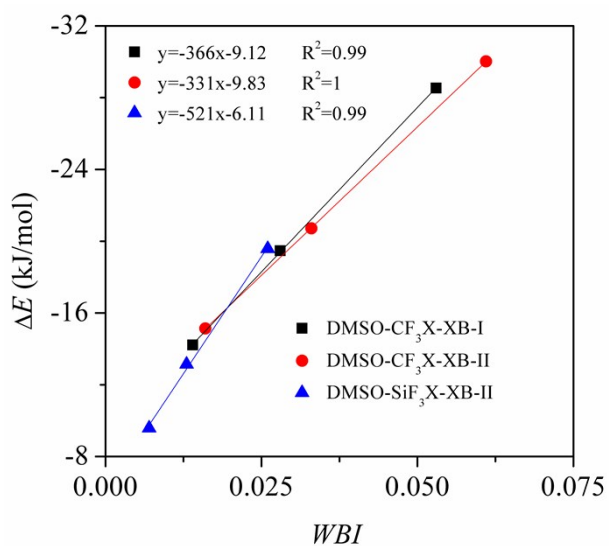

Fig. S2 WBI of O...X halogen bond versus the interaction energy.
